# Supplementary material
Source: MDPI journal article supplement (https://www.mdpi.com/2504-446X/3/1/25)
Supplement: s1 [file S3_mix_errormat.xlsx]

## Sheet: Sheet1
		Reference
		Treated_S	Untreated_S	Total	UA
Prediction	Treated_S	5079	932	6011	0.844951
	Untreated_S	1045	5188	6233	0.832344
	Total	6124	6120	12244
	PA	0.82936	0.847712		0.838533
