# Supplementary material
Source: MDPI journal article supplement (https://www.mdpi.com/2504-446X/3/1/25)
Supplement: s1 [file S3_mixshadows_errormat.docx]

**S3.** Classification metrics for the classification when shadows were mixed in their respective treatment class. The lower right cell contains the overall accuracy (83.9%). Class specific accuracies can be found in the lower marginal row (producer accuracy, PA) and outer right marginal column (user accuracy, UA). Values shown in diagonal cells contain correctly classified pixel samples for each class and the total number of pixel samples (12244).

| Error Matrix | | Reference | | | |
| --- | --- | --- | --- | --- | --- |
| Treated_S | Untreated_S | Total | UA |
| Prediction | Treated_S | **5079** | 932 | 6011 | 84.5% |
| Untreated_S | 1045 | **5188** | 6233 | 83.2% |
| Total | 6124 | 6120 | **12244** |  |
| PA | 82.9% | 84.8% |  | **83.9%** |
