# Supplementary material
Source: MDPI journal article supplement (https://www.mdpi.com/2504-446X/3/1/25)
Supplement: s1 [file S4_noshadows_errormat.xlsx]

## Sheet: Sheet1
		Reference
		Treated	Untreated	Total	UA
Prediction	Treated	1143	32	1175	0.972766
	Untreated	60	1171	1231	0.951259
	Total	1203	1203	2406
	PA	0.950125	0.9734		0.961762
