# Supplementary material
Source: MDPI journal article supplement (https://www.mdpi.com/2504-446X/3/1/25)
Supplement: s1 [file S5_mixshadows_features.docx]

**S5**. Important predictors for the classification when shadow pixels were mixed in the untreated and treated class. The absolute and relative importance is provided. The first row indicates the overall rank for each predictor.

| Rank | 1 | 2 | 3 | 4 | 5 | 6 | 7 | 8 | 9 |
| --- | --- | --- | --- | --- | --- | --- | --- | --- | --- |
| **Band** | **NIR** | **GR** | **RE** | **G** | **ARI** | **B** | **NDVI** | **R** | **SIPI** |
| Abs. Imp. | 0.16 | 0.13 | 0.11 | 0.08 | 0.08 | 0.07 | 0.07 | 0.07 | 0.06 |
| Rel. Imp. | 1 | 0.67 | 0.49 | 0.23 | 0.2 | 0.12 | 0.1 | 0.07 | 0 |
